# Supplementary material
Source: Research Square preprint supplement (doi:10.21203/rs.3.rs-8913561/v1)
Supplement: Supplementary file 1 [file 96c677e72f844ddd1e0042fb.docx]

| **Category** | **Generic/Brand name** |
| --- | --- |
| Antiresorptive Medications | GENERIC_DRUG-ALENDRONATE_SODIUM, GENERIC_DRUG-ALENDRONATE_SODIUM/VITAMIN_D3, GENERIC_DRUG-RISEDRONATE_SOD/CALCIUM_CARB, GENERIC_DRUG-RISEDRONATE_SODIUM, GENERIC_DRUG-IBANDRONATE_SODIUM, GENERIC_DRUG-ZOLEDRONIC_ACID, DRUG-FOSAMAX, DRUG-FOSAMAX_PLUS_D, DRUG-ACTONEL, DRUG-ACTONEL_WITH_CALCIUM, DRUG-RECLAST, DRUG-BONIVA, GENERIC_DRUG-DENOSUMAB, DRUG-PROLIA |

Table S1. Antiresorptive medications

Generic and brand names used to query the prescription of antiresorptive medications.

Table S2. ICD 9 and 10 codes

| **Category** | **ICD 9/10 diagnosis codes** |
| --- | --- |
| Osseous Metastasis | ICD-9-D-1985,  ICD-10-D-C7951,  ICD-10-D-C7952 |
| Pathologic Fractures | ICD-10-D-M8450XA, ICD-10-D-M8458XA,  ICD-10-D-M84511A, ICD-10-D-M84512A,  ICD-10-D-M84519A, ICD-10-D-M84521A,  ICD-10-D-M84522A, ICD-10-D-M84529A,  ICD-10-D-M84531A, ICD-10-D-M84532A,  ICD-10-D-M84533A, ICD-10-D-M84534A,  ICD-10-D-M84539A, ICD-10-D-M84541A, ICD-10-D-M84542A, ICD-10-D-M84549A,  ICD-10-D-M84551A, ICD-10-D-M84552A, ICD-10-D-M84553A, ICD-10-D-M84559A,  ICD-10-D-M84561A, ICD-10-D-M84562A,  ICD-10-D-M84563A, ICD-10-D-M84564A,  ICD-10-D-M84569A, ICD-10-D-M84571A,  ICD-10-D-M84572A, ICD-10-D-M84573A, ICD-10-D-M84574A, ICD-10-D-M84575A,  ICD-10-D-M84579A |
| **Primary Cancer Type** |  |
| Breast | ICD-10-D-C500: ICD-10-D-C509,  ICD-9-D-1740: ICD-9-D-1749 |
| Prostate | ICD-10-D-C61, ICD-9-D-185 |
| Kidney | ICD-10-D-C641, ICD-10-D-C642,  ICD-10-D-C649, ICD-9-D-1890 |
| Lung | ICD-10-D-C340: ICD-10-D-C349,  ICD-9-D-1622: ICD-9-D-1629 |
| Lymphoma | ICD-10-D-C810: ICD-10-D-C819,  ICD-10-D-C820: ICD-10-D-C829,  ICD-10-D-C830: ICD-10-D-C839,  ICD-10-D-C840: ICD-10-D-C849,  ICD-10-D-C850: ICD-10-D-C859,  ICD-10-D-C860: ICD-10-D-C869,  ICD-10-D-C880: ICD-10-D-C889,  ICD-9-D-2000: ICD-9-D-2008,  ICD-9-D-2010: ICD-9-D-2019,  ICD-9-D-2020: ICD-9-D-2029 |
| Multiple Myeloma | ICD-9-D-2030, ICD-9-D-2031,  ICD-9-D-2032, ICD-10-D-C9000,  ICD-10-D-C9001, ICD-10-D-C9002 |
| Thyroid | ICD-10-D-C73, ICD-9-D-193 |

International Classification of Diseases nineth and tenth (ICD- 9/10) codes used to identify each diagnosis
